# Supplementary material for: Atlasing white matter and grey matter joint contributions to resting-state networks in the human brain
Source: bioRxiv or medRxiv preprint supplement (doi:10.1101/2022.01.10.475690), 2023-01-10
Supplement: Supplementary file [file media-1.pdf]

# Supplementary information

## Index

**WhiteRest atlas anatomical labelling ..... 1**  
**WhiteRest module output table of the CSO lesion analysis ..... 16**

## WhiteRest atlas anatomical labelling

We provide a detailed anatomical labelling (white and grey matter) of each resting-state network. The RSNs are displayed in 3D, with a “glass brain” effect to show both grey and white matter parts of the RSNs. Multiple views of each RSN are given, with the orientation noted in grey under each view. In the figures, the grey matter part of the RSN, showed in red, was annotated using the Atlas of Human Brain Connections<sup>1</sup>. Likewise, the white matter part of the RSN showed in green was annotated using the atlas derived from Rojkova et al. (2016)<sup>2</sup>. The labelling was done manually and checked by multiple experts (VN, SF, MTdS, MJ).

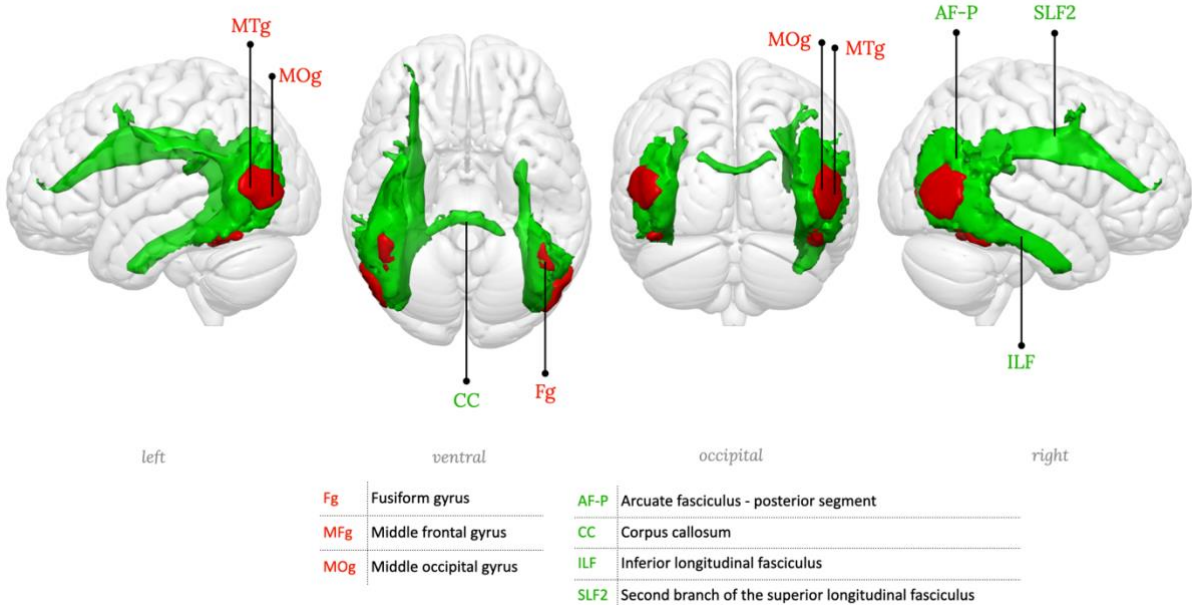

**Supplementary figure 1: RSN01, Lateral occipital network**

<sup>1</sup> M. Catani, M. Thiebaut de Schotten (2012). DOI: 10.1093/med/9780199541164.001.0001  
<sup>2</sup> K. Rojkova et al. (2016). DOI: 10.1007/s00429-015-1001-3. Atlas available at [http://www.bcblab.com/BCB/Atlas\\_of\\_Human\\_Brain\\_Connections.html](http://www.bcblab.com/BCB/Atlas_of_Human_Brain_Connections.html)

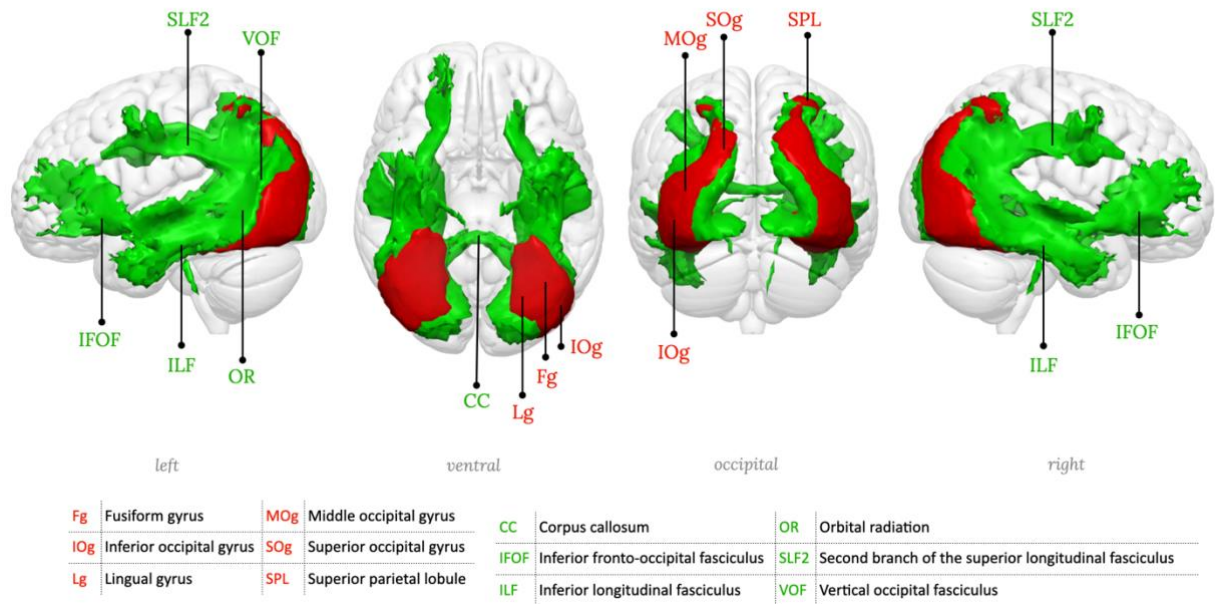

**Supplementary figure 2: RSN02, Lateral posterior occipital network**

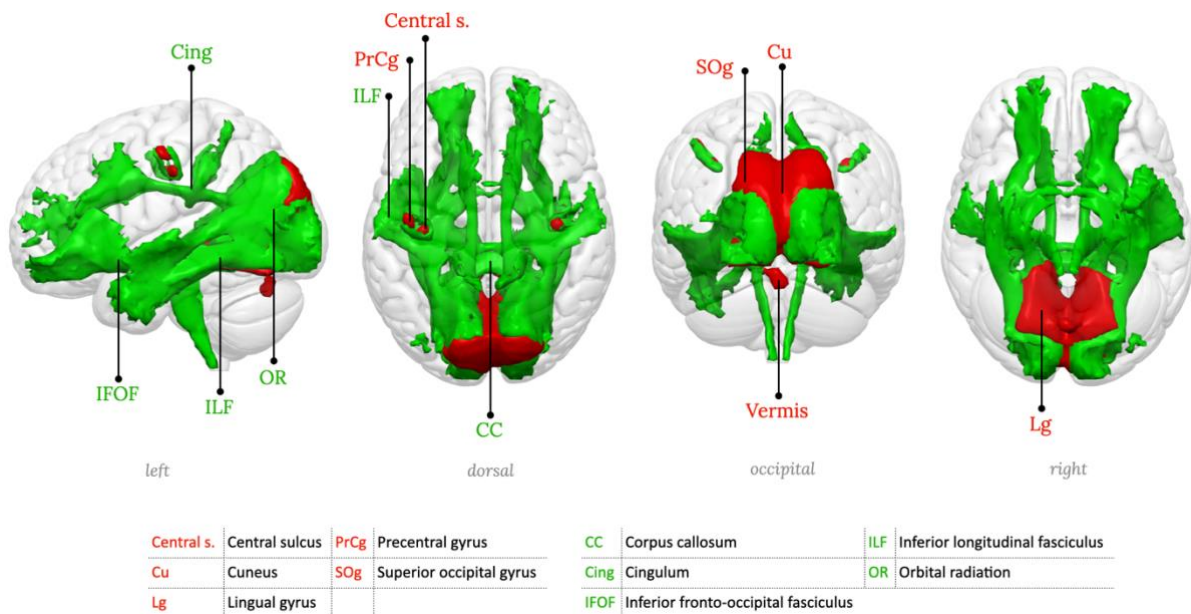

**Supplementary figure 3: RSN03, Medial occipital network**

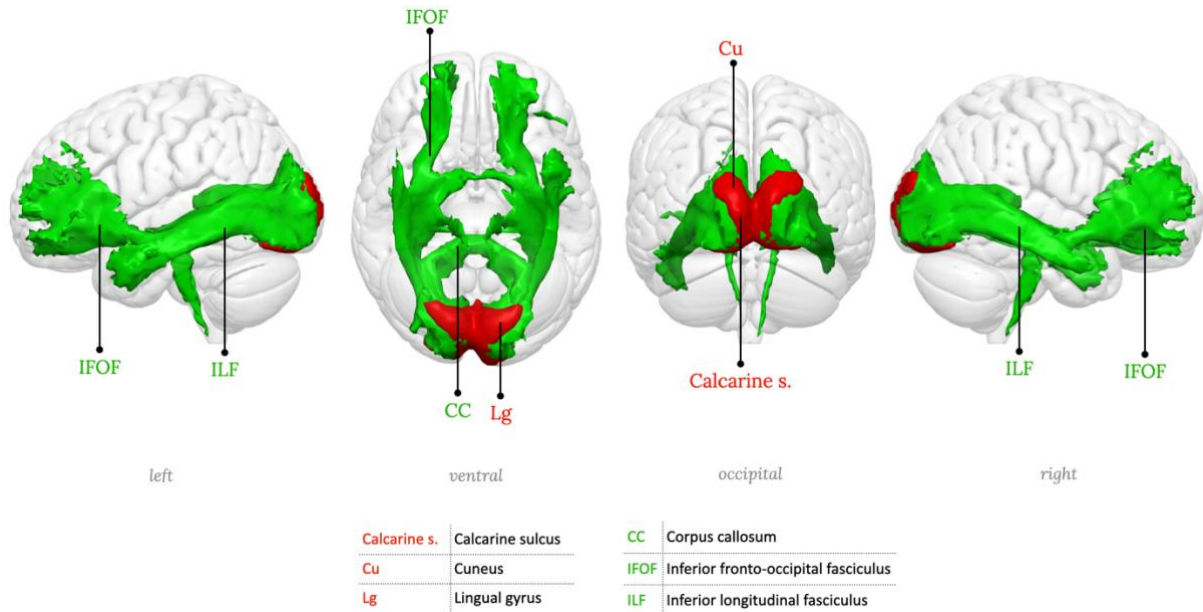

**Supplementary figure 4:** RSN04, Medial posterior occipital network, primary visual network

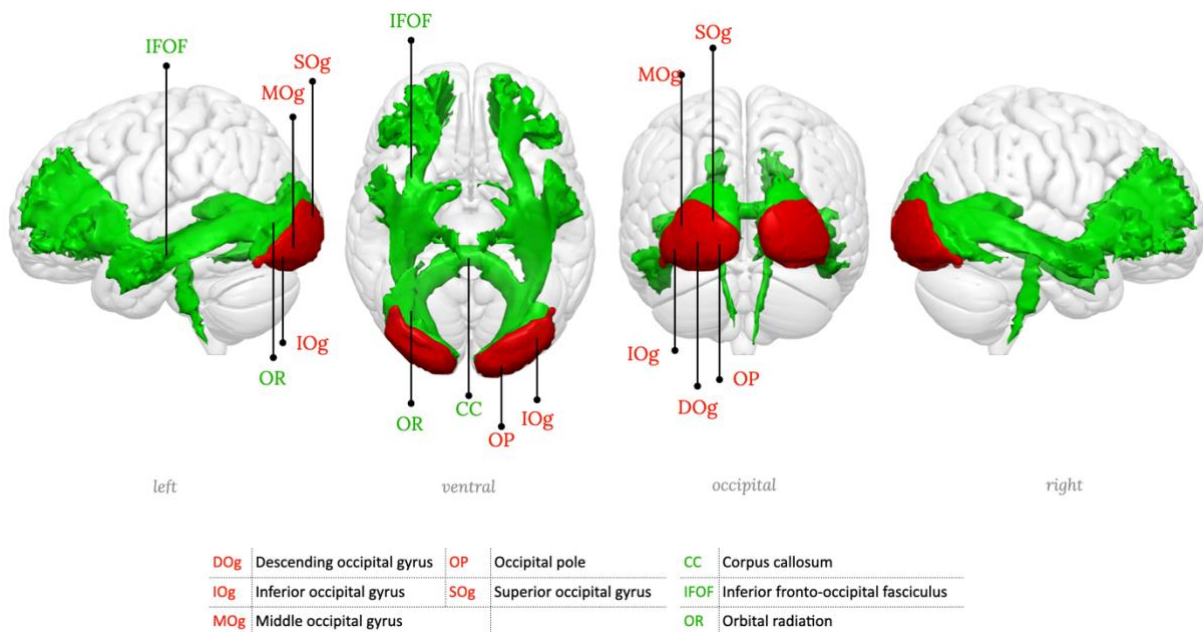

**Supplementary figure 5:** RSN05, Posterior occipital network.

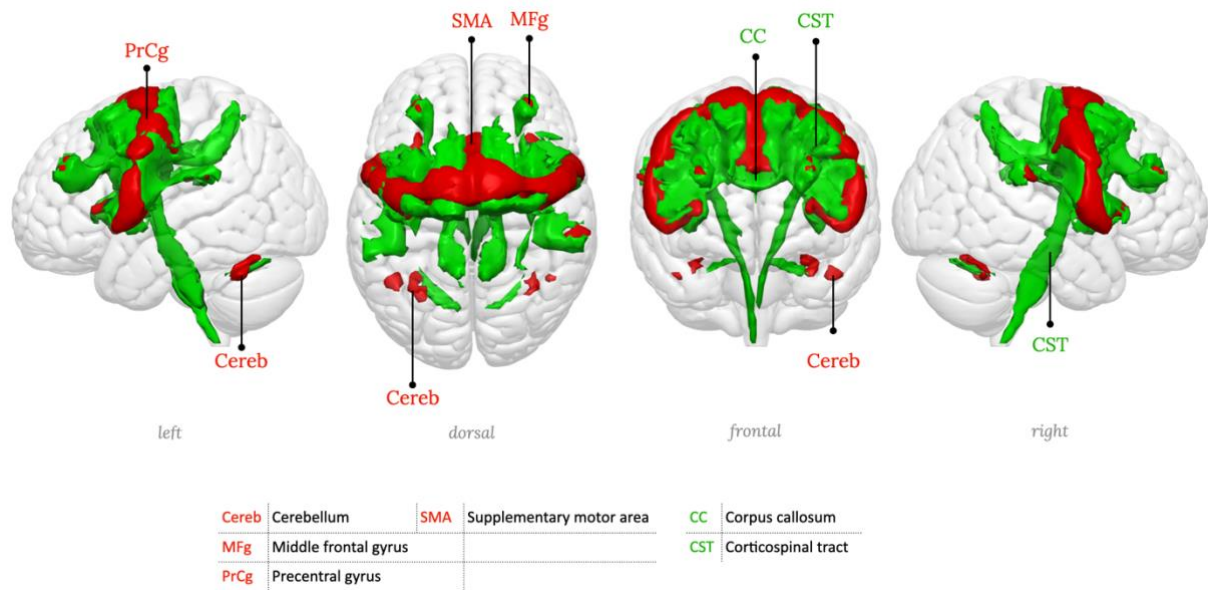

**Supplementary figure 6:** RSN06, Precentral network, Motor network.

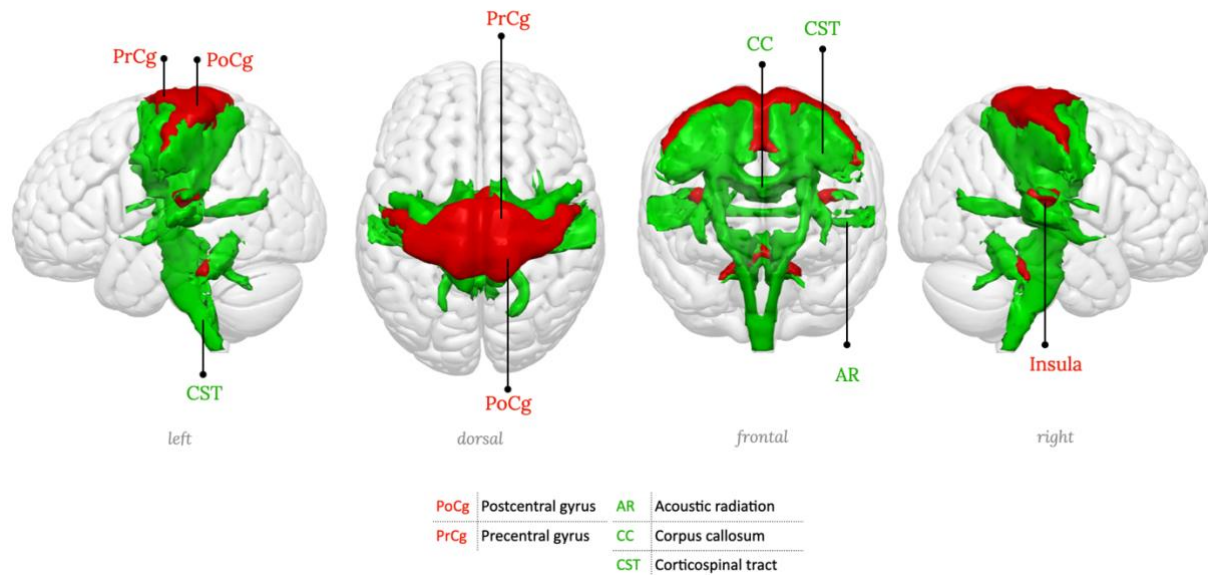

**Supplementary figure 8:** RSN08, Middle central network, left hemisphere component (somato-motor, right hand portion)

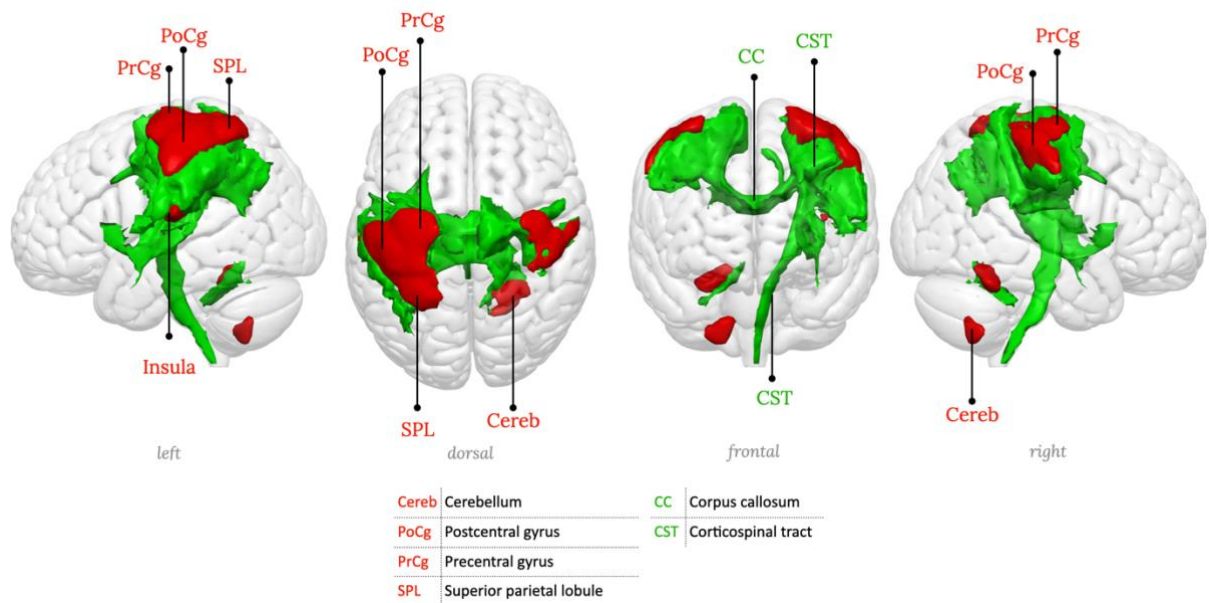

**Supplementary figure 9:** RSN09, Middle central network, right hemisphere component (somato-motor, left hand portion)

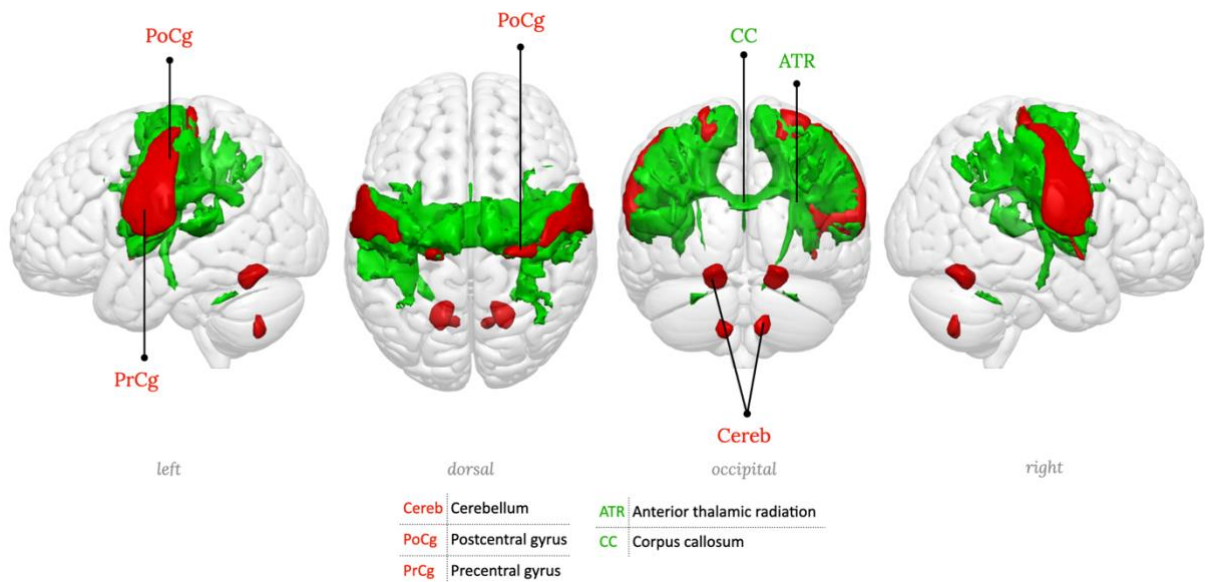

**Supplementary figure 10:** RSN10, Inferior central network (somato-motor, head portion)

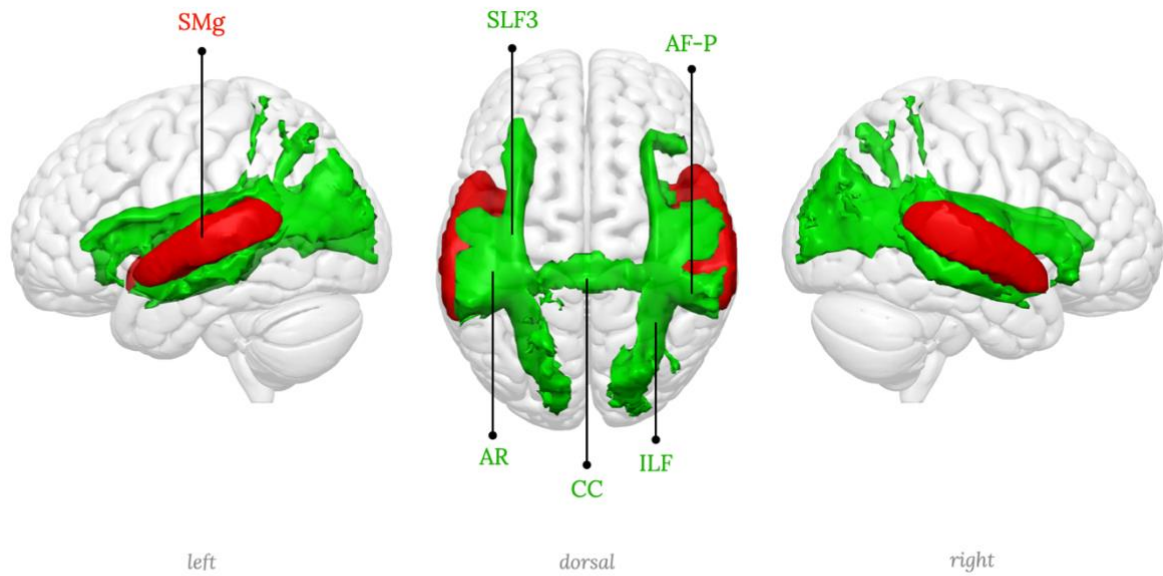

|            |                     |             |                                                      |            |                                  |
|------------|---------------------|-------------|------------------------------------------------------|------------|----------------------------------|
| <b>SMg</b> | Supramarginal gyrus | <b>AF-P</b> | Arcuate fasciculus - posterior segment               | <b>ILF</b> | Inferior longitudinal fasciculus |
| <b>AR</b>  | Acoustic radiation  | <b>SLF3</b> | Third branch of the superior longitudinal fasciculus |            |                                  |
| <b>CC</b>  | Corpus callosum     |             |                                                      |            |                                  |

**Supplementary figure 11:** RSN11, Superior temporal network, Primary auditory network.

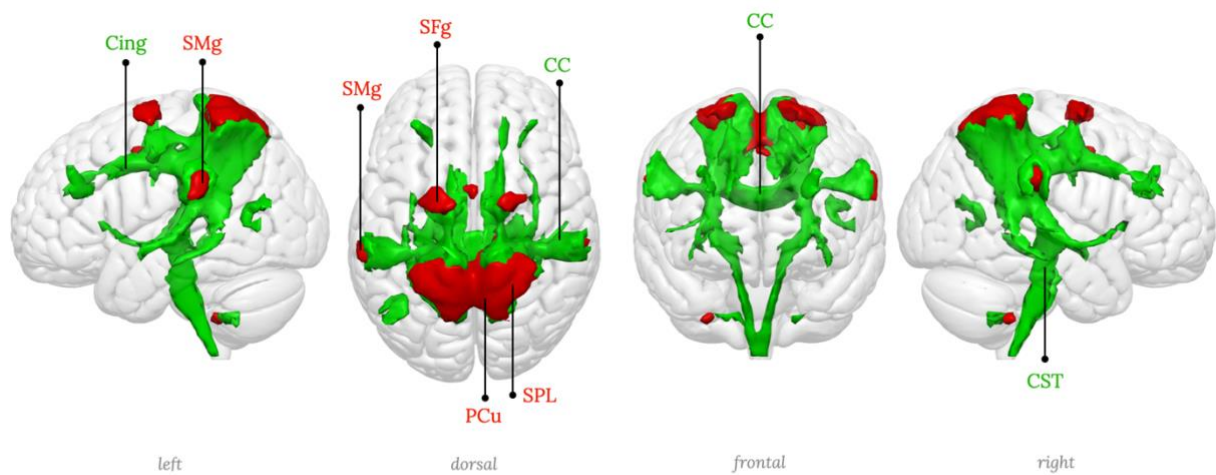

|            |                          |             |                     |
|------------|--------------------------|-------------|---------------------|
| <b>PCu</b> | Precuneus                | <b>CC</b>   | Corpus callosum     |
| <b>SFg</b> | Superior frontal gyrus   | <b>Cing</b> | Cingulum            |
| <b>SMg</b> | Supramarginal gyrus      | <b>CST</b>  | Corticospinal tract |
| <b>SPL</b> | Superior parietal lobule |             |                     |

**Supplementary figure 12:** RSN12, Anterior superior parietal network

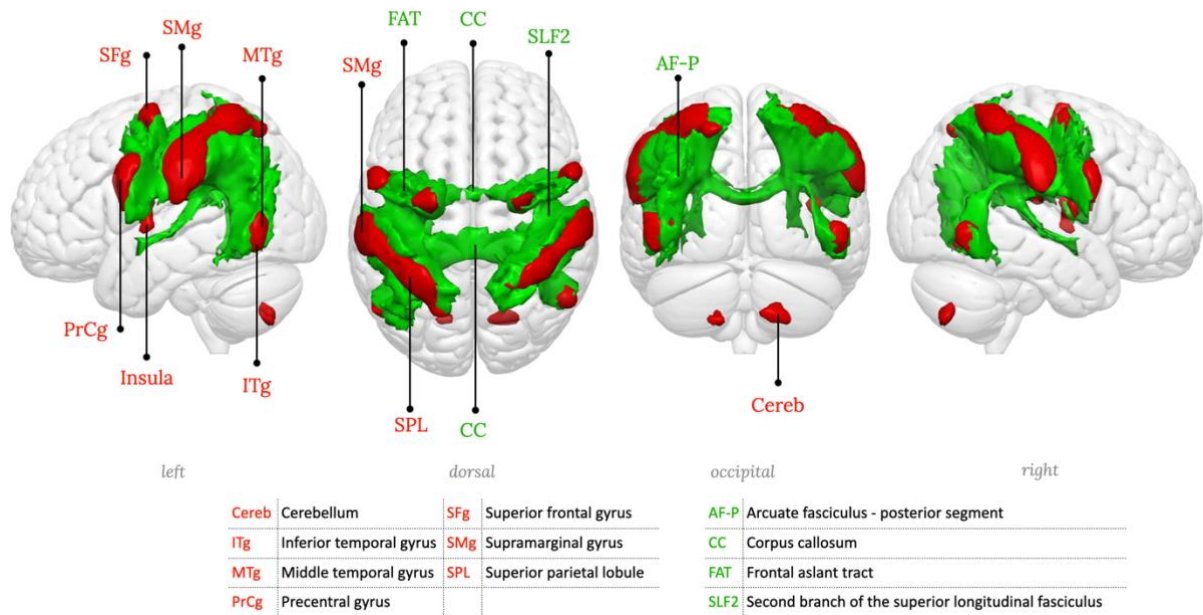

**Supplementary figure 13:** RSN13, Superior parietal network, Dorsal attention network

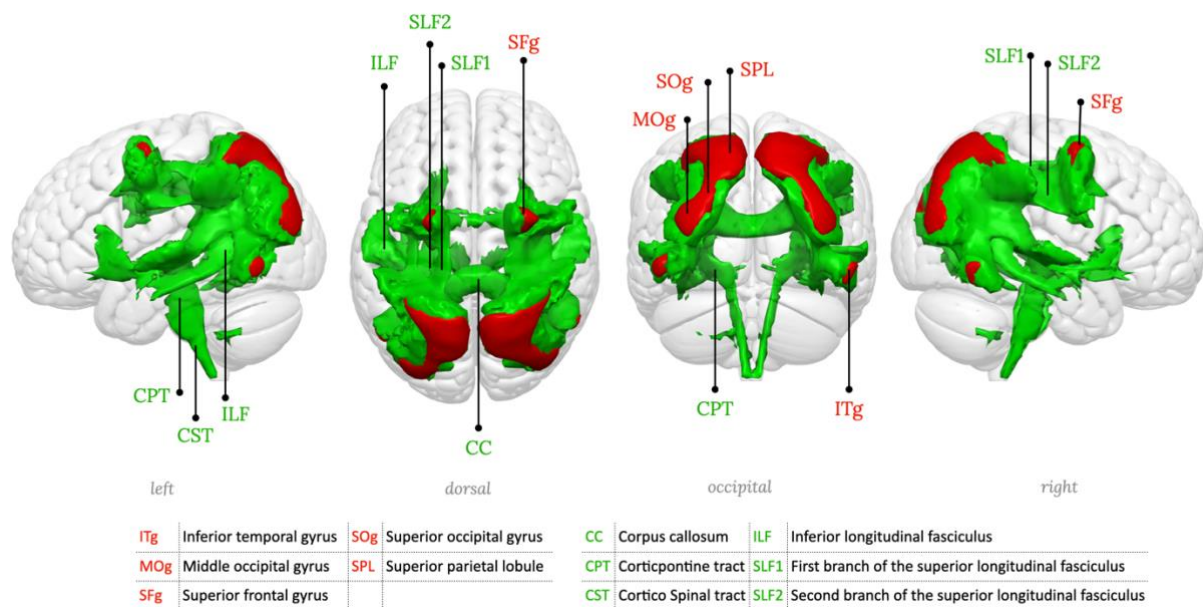

**Supplementary figure 14:** RSN14, Posterior superior parietal network

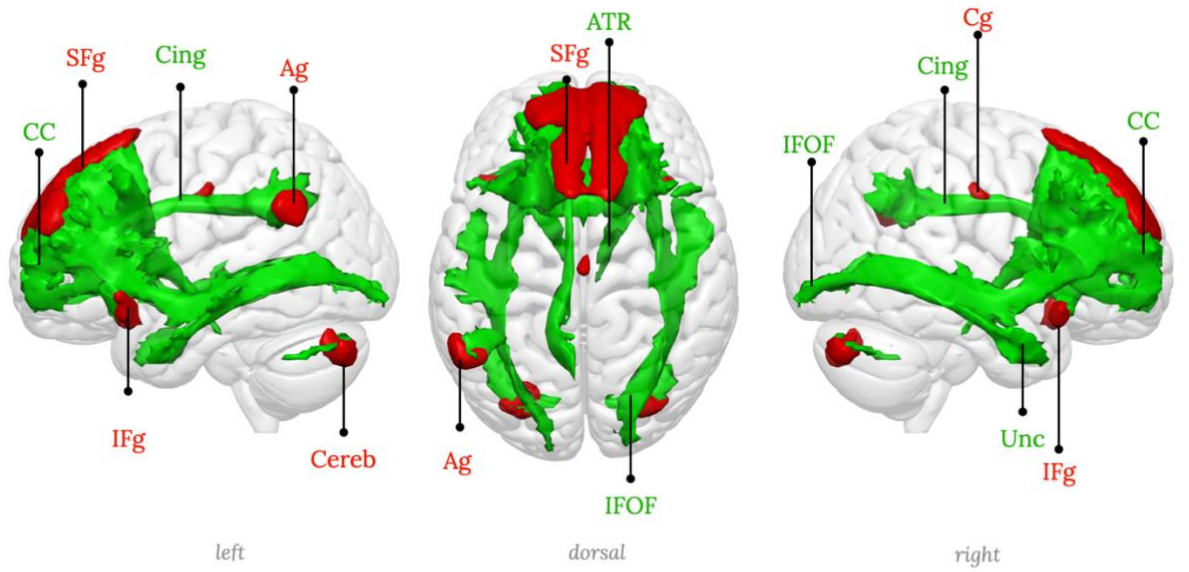

|       |                 |     |                        |      |                             |      |                                      |
|-------|-----------------|-----|------------------------|------|-----------------------------|------|--------------------------------------|
| Ag    | Angular gyrus   | IFg | Inferior frontal gyrus | ATR  | Anterior thalamic radiation | IFOF | Inferior fronto-occipital fasciculus |
| Cereb | Cerebellum      | SFg | Superior frontal gyrus | CC   | Corpus callosum             | Unc  | Uncinate fasciculus                  |
| Cg    | Cingulate gyrus |     |                        | Cing | Cingulum                    |      |                                      |

Supplementary figure 15: RSN15, Medial frontal network

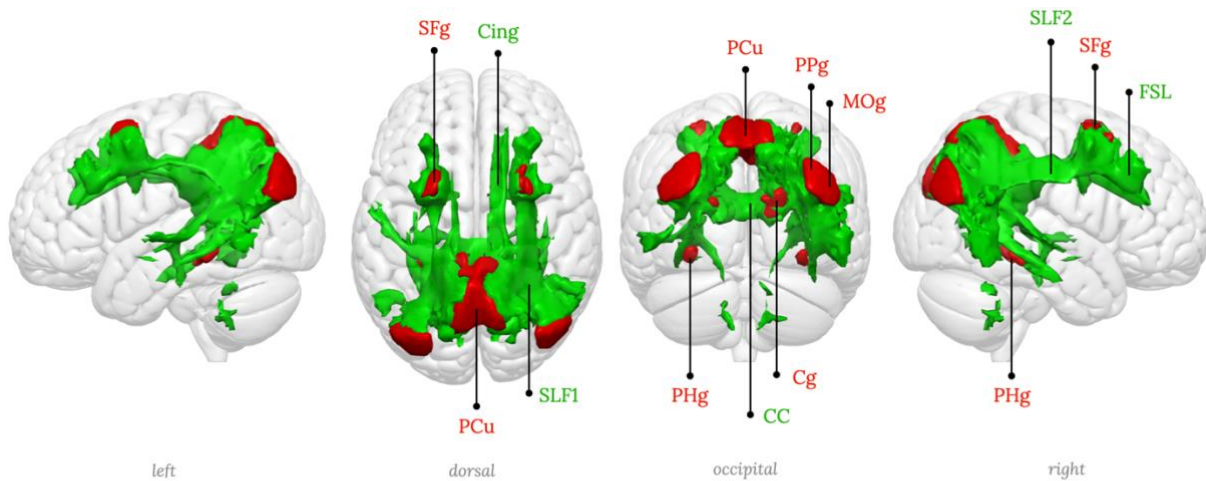

|     |                        |     |                          |      |                                                       |
|-----|------------------------|-----|--------------------------|------|-------------------------------------------------------|
| Cg  | Cingulate gyrus        | PHg | Parahippocampal gyrus    | CC   | Corpus callosum                                       |
| MOg | Middle occipital gyrus | PPg | Posterior parietal gyrus | Cing | Cingulum                                              |
| PCu | Precuneus              | SFg | Superior frontal gyrus   | FSL  | Frontal superior longitudinal tract                   |
|     |                        |     |                          | SLF2 | Second branch of the superior longitudinal fasciculus |

Supplementary figure 16: RSN16, Posterior parietal-precuneal network, Posterior default mode network



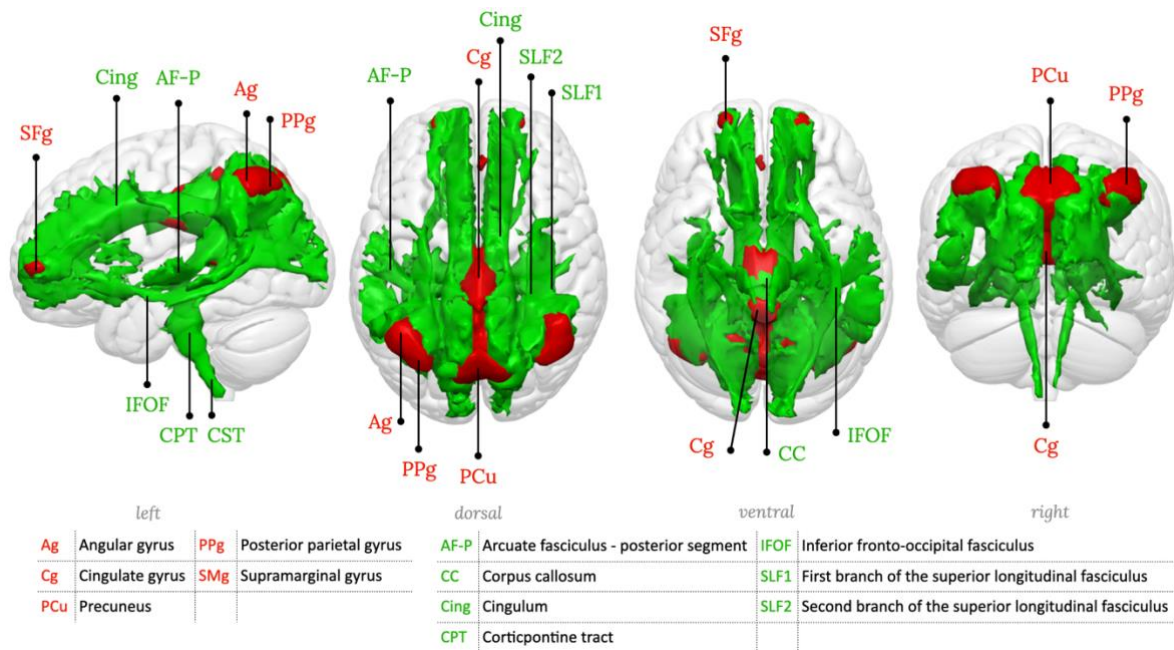

**Supplementary figure 17:** RSN17, Posterior cingulate-precuneal network, Dorsal default mode network

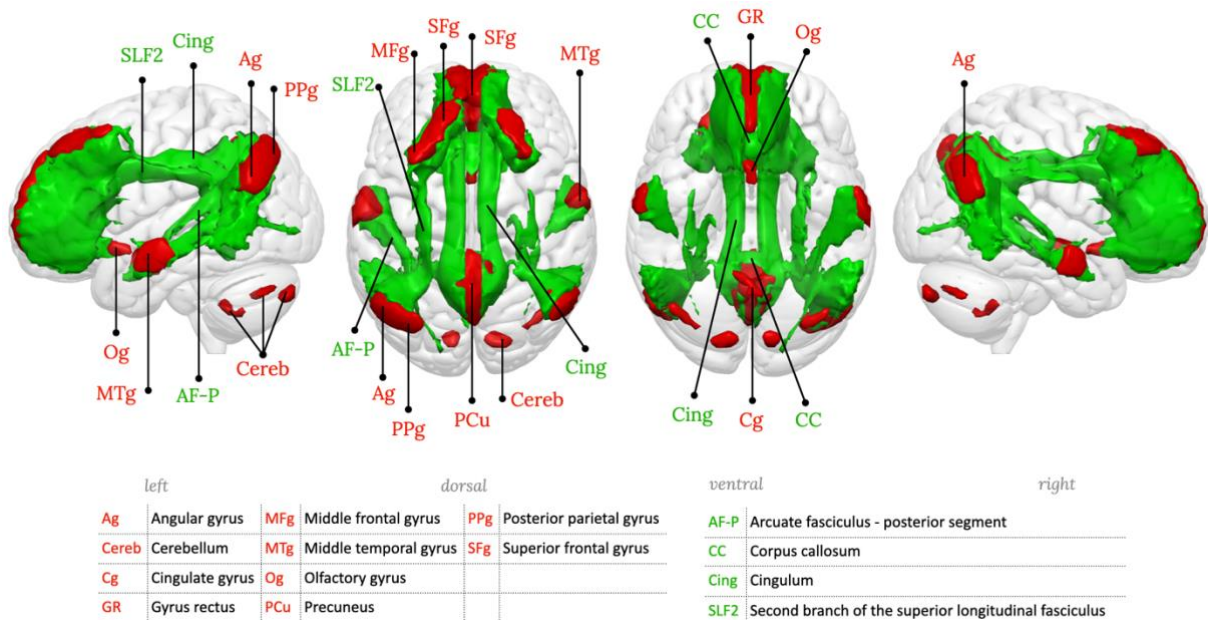

**Supplementary figure 18:** RSN18, Precuneus network, Default mode network proper

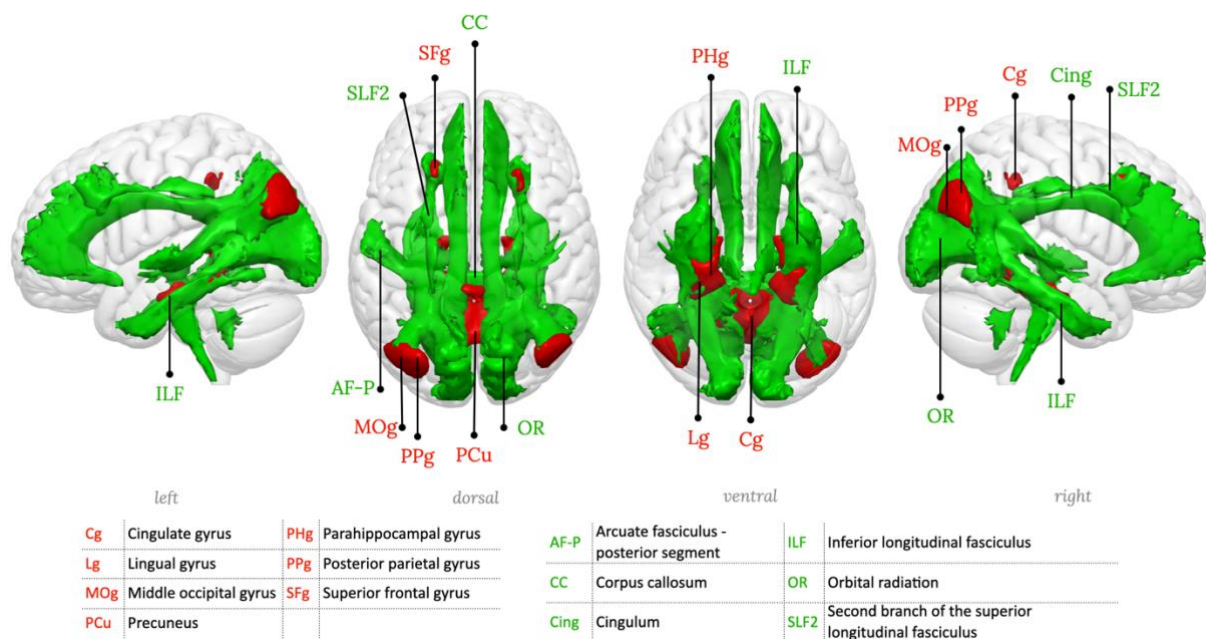

**Supplementary figure 19:** RSN19, Parahippocampal-precuneal network, Parahippocampal default mode network

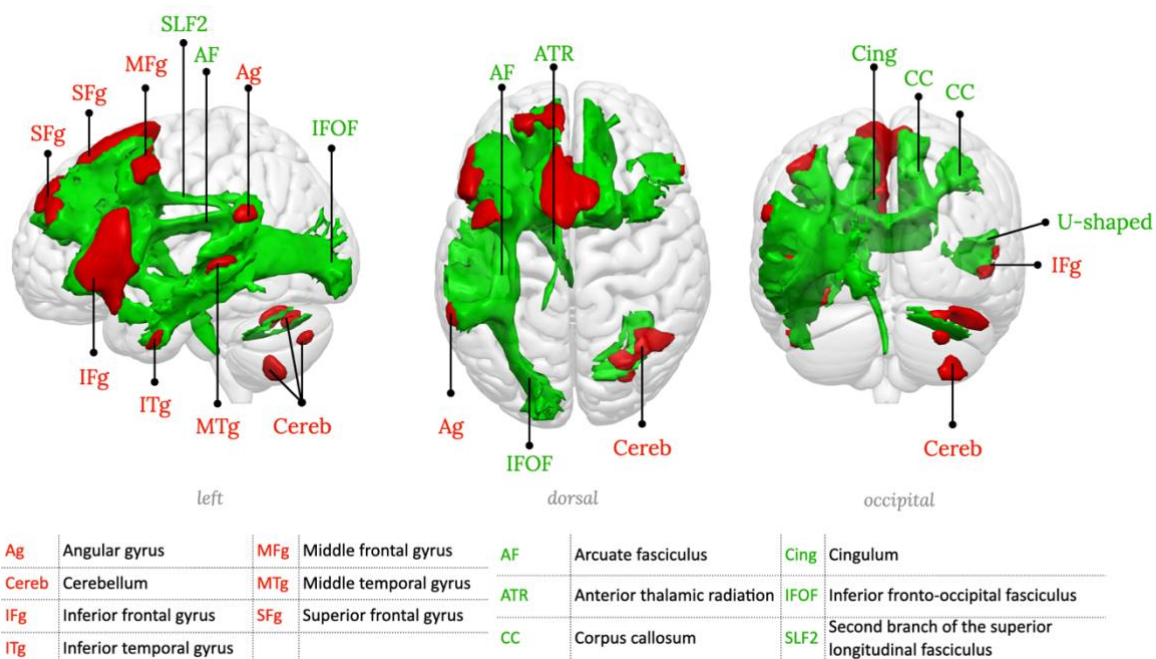

**Supplementary figure 20:** RSN20, Left inferior frontal network, Language production network

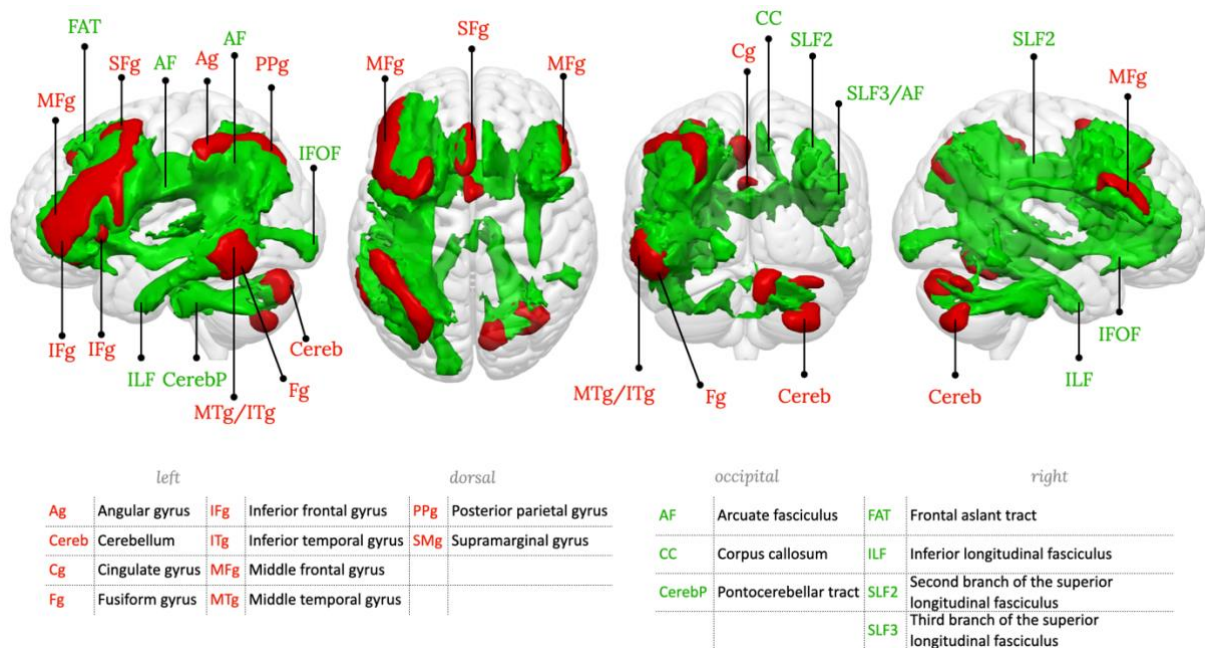

**Supplementary figure 21:** RSN21, Fronto-parieto-temporal network 1, left hemisphere component

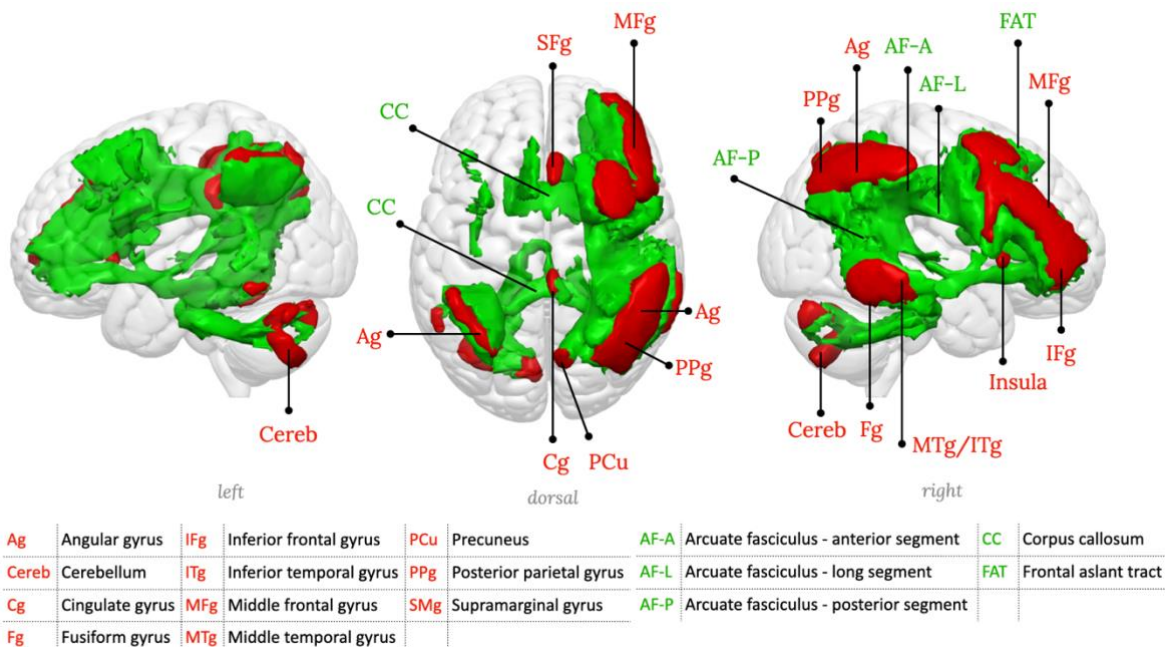

**Supplementary figure 22:** RSN22, Fronto-parieto-temporal network 1, right hemisphere component

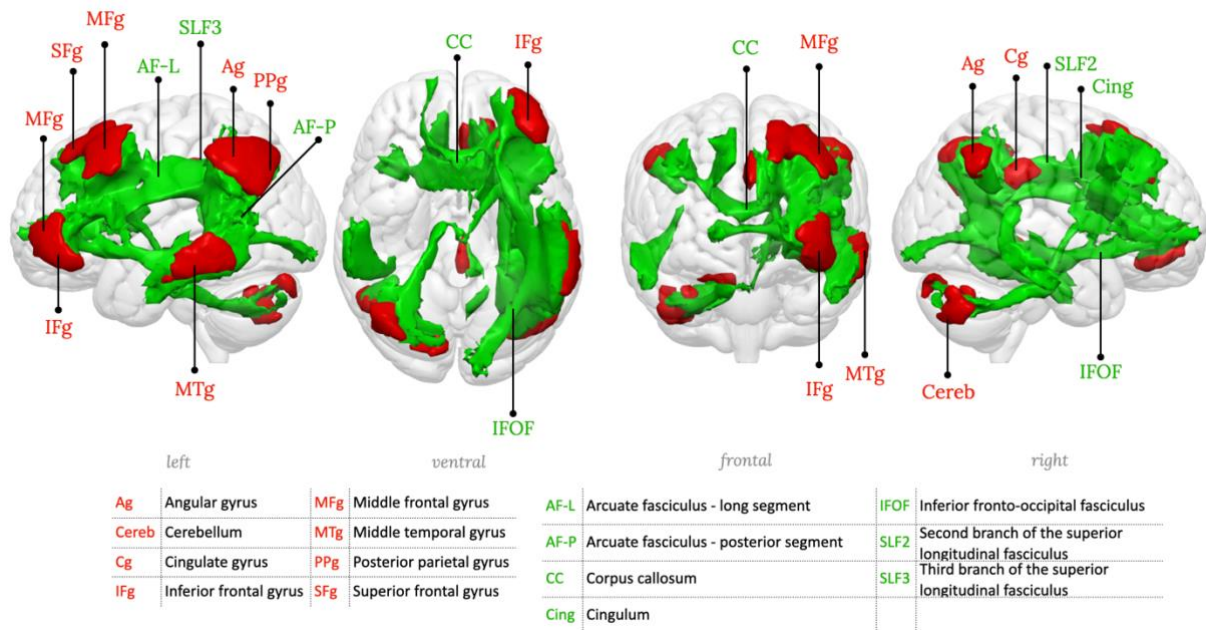

**Supplementary figure 23:** RSN23, Fronto-parieto-temporal network 2, left hemisphere component

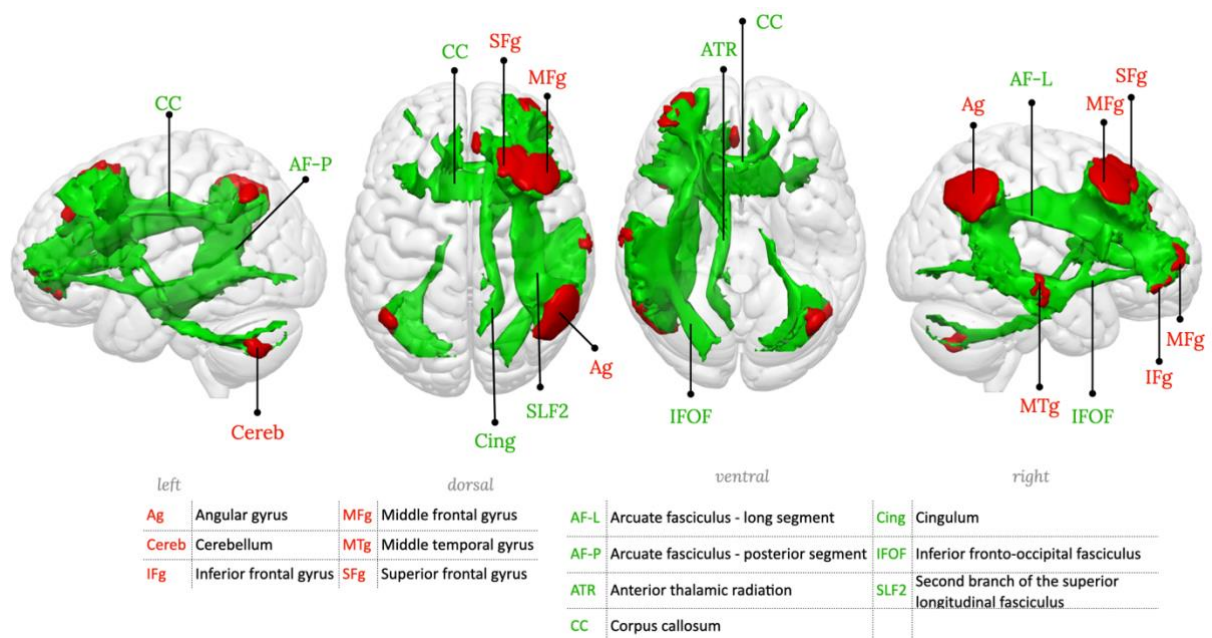

**Supplementary figure 24:** RSN24, Fronto-parieto-temporal network 2, right hemisphere component

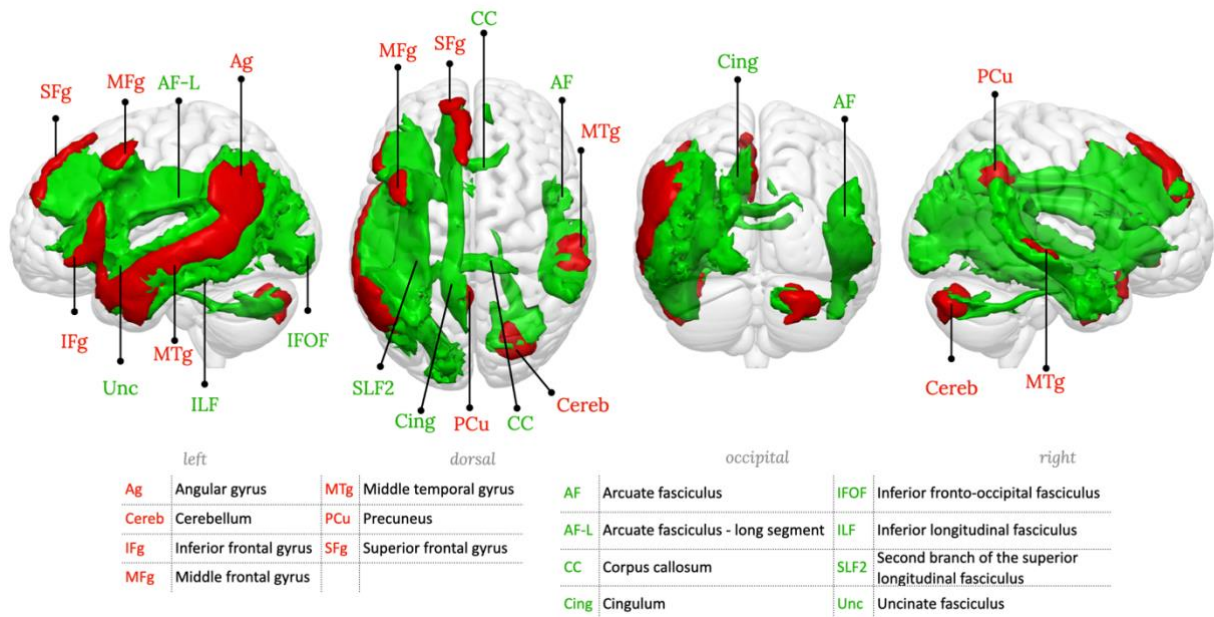

**Supplementary figure 25:** RSN25, Fronto-parieto-temporal network 3, left hemisphere component

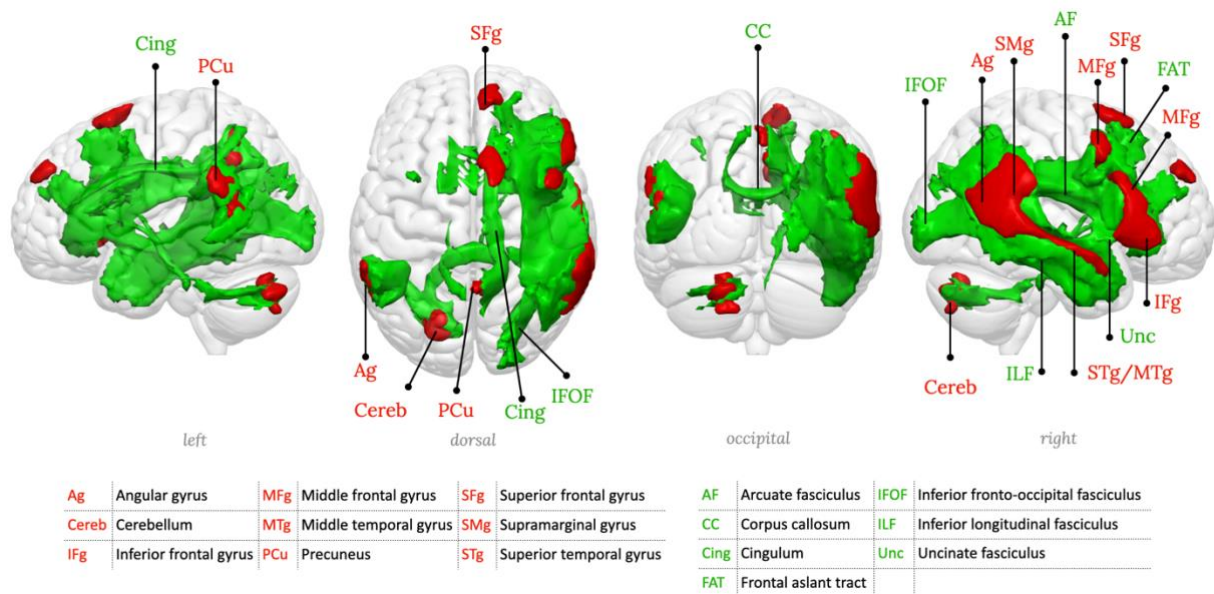

**Supplementary figure 26:** RSN26, Fronto-parieto-temporal network 3, right hemisphere component

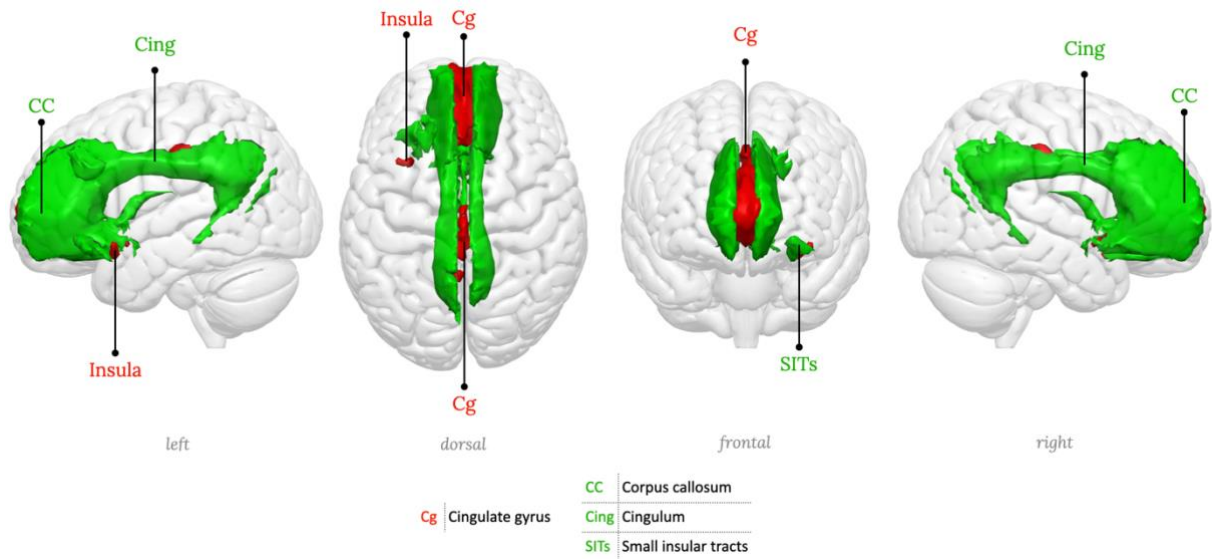

**Supplementary figure 27:** RSN27, Anterior cingulate network

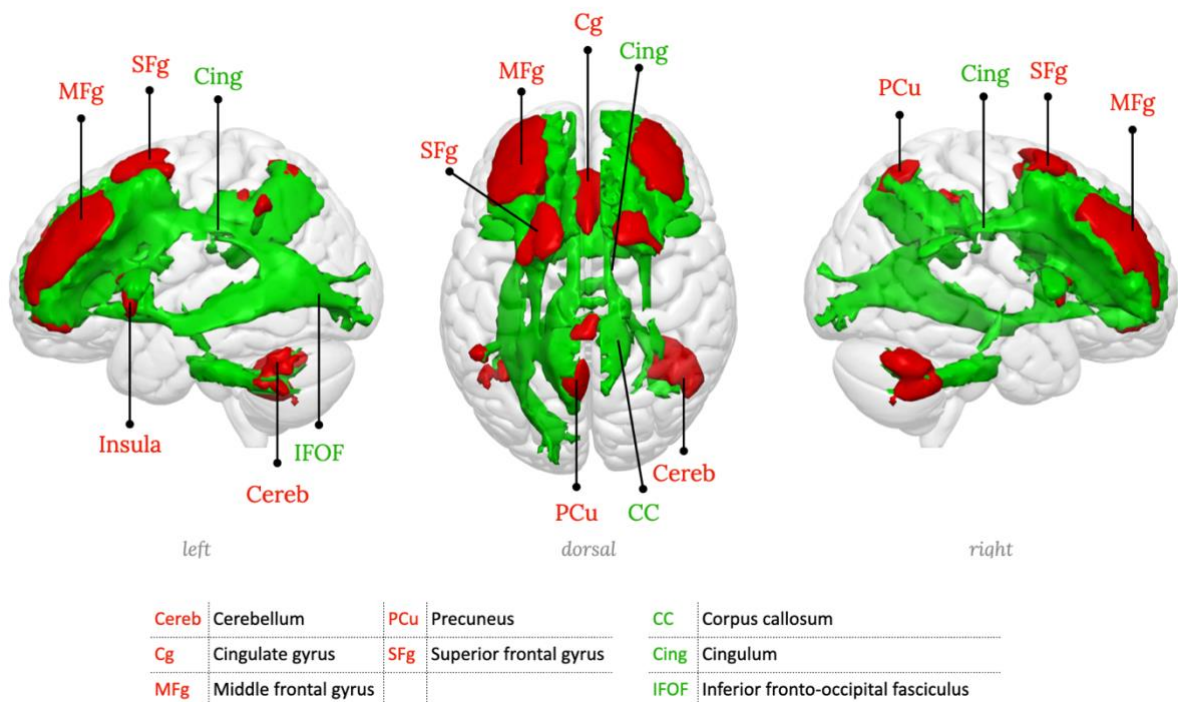

**Supplementary figure 28:** RSN28, Dorso-lateral prefrontal cortex network

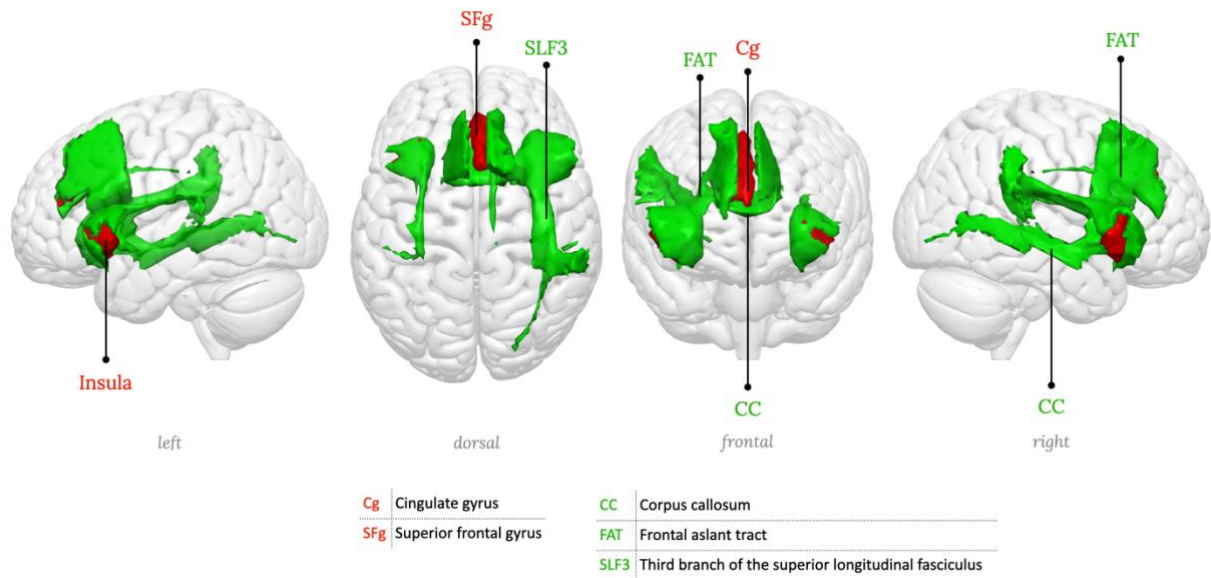

**Supplementary figure 29: RSN29, Insula network, Saliency network**

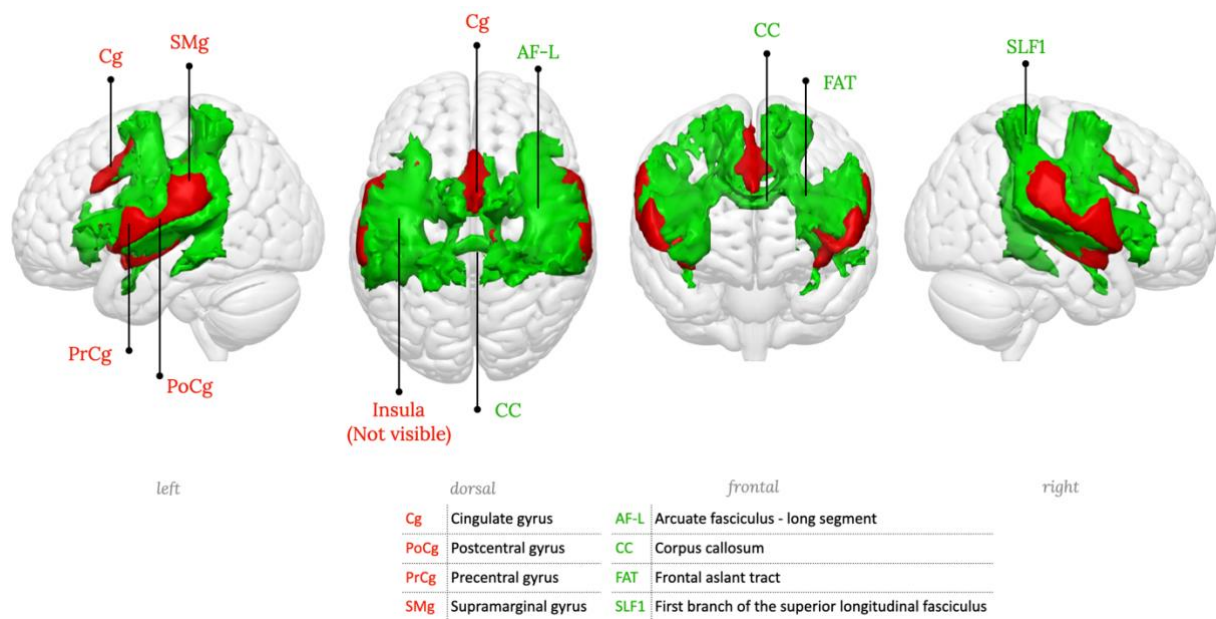

**Supplementary figure 30: RSN30, Cingulo-opercular network**

## WhiteRest module output table of the CSO lesion analysis

In the main text, we give an example of analysis from the WhiteRest module (Figure 6), using a synthetic lesion in the left centrum semiovale (CSO). In addition to the pie chart displaying the main results, the complete output from the program also comprises a table with various measures for all involved RSNs:

**Supplementary Table 1:** WhiteRest raw output for the CSO ROI

Presence (%): Presence (raw): see the Methods. Presence/RSN (%): Presence (raw) from the ROI divided by the brain-wide Presence of the RSN. It reflects how much of the RSN is in the ROI. Coverage (%): Percentage of voxels of the ROI that belong to the RSN. It reflects how much of the ROI intersects with the RSN.

| RSN number | RSN name                           | Presence (%) | Presence (raw) | Presence/RSN (%) | Coverage (%) |
|------------|------------------------------------|--------------|----------------|------------------|--------------|
| RSN11      | Precentral / Motor                 | 15,27        | 8406,48        | 3,32             | 92,24        |
| RSN05      | FPT 1 (L)                          | 12,95        | 7128,12        | 2,88             | 68,31        |
| RSN13      | Mid. Central (L) / SM hand (L)     | 9,05         | 4984,57        | 2,34             | 60,80        |
| RSN17      | Dorsal attention                   | 8,81         | 4849,31        | 2,37             | 69,60        |
| RSN16      | Inf. Central / SM head             | 8,63         | 4748,65        | 2,14             | 46,96        |
| RSN22      | Post. Sup. Par.                    | 6,68         | 3676,58        | 1,29             | 51,88        |
| RSN09      | FPT 2 (L)                          | 6,28         | 3459,62        | 1,77             | 46,44        |
| RSN03      | dIPFC                              | 5,86         | 3226,15        | 1,97             | 42,04        |
| RSN12      | Sup. Central / SM body             | 5,45         | 3001,98        | 1,29             | 33,64        |
| RSN07      | FPT 3 (L)                          | 4,16         | 2289,36        | 0,94             | 30,14        |
| RSN14      | Mid. Central (R) / SM hand (R)     | 3,33         | 1834,59        | 1,03             | 27,04        |
| RSN21      | PP-Precuneal / Posterior DMN       | 3,32         | 1826,17        | 0,82             | 26,26        |
| RSN27      | Lat. Post. Occ.                    | 2,89         | 1589,86        | 0,62             | 21,86        |
| RSN04      | Left frontal                       | 2,70         | 1487,91        | 0,94             | 21,22        |
| RSN23      | PC-Precuneal / Dorsal DMN          | 1,13         | 620,64         | 0,24             | 9,18         |
| RSN24      | DMN proper                         | 0,93         | 512,65         | 0,27             | 8,28         |
| RSN25      | PH-Precuneal / Parahippocampal DMN | 0,93         | 511,60         | 0,19             | 8,41         |
| RSN19      | Cingulo-opercular                  | 0,80         | 439,96         | 0,18             | 6,21         |
| RSN26      | Lat. Occ.                          | 0,64         | 352,73         | 0,15             | 5,95         |
| RSN06      | FPT 1 (R)                          | 0,09         | 51,40          | 0,02             | 0,91         |
| RSN15      | Ant. Sup. Par.                     | 0,08         | 43,50          | 0,03             | 0,78         |
| RSN28      | Med. Occ.                          | 0,01         | 7,35           | 0,00             | 0,13         |
